# Supplementary material for: Structural insights into the IgE mediated responses induced by the allergens Hev b 8 and Zea m 12 in their dimeric forms
Source: PubMed Central journal article supplement (PMC5009318; doi:10.1038/srep32552), 2016-09-02
Supplement: srep32552-s1.pdf [file srep32552-s1.pdf]

**Supplementary information**

**Structural insights into the IgE mediated responses induced by the allergens Hev b 8 and Zea m 12 in their dimeric forms**

Israel Mares-Mejía<sup>1</sup>, Siseth Martínez-Caballero<sup>1</sup>, Claudia Garay-Canales<sup>2</sup>, Patricia Cano-Sánchez<sup>1</sup>, Alfredo Torres-Larios<sup>3</sup>, Samuel Lara-González<sup>4</sup>, Enrique Ortega<sup>2</sup>, & Adela Rodríguez-Romero<sup>1\*</sup>

<sup>1</sup>Instituto de Química, <sup>2</sup>Instituto de Investigaciones Biomédicas, <sup>3</sup>Instituto de Fisiología Celular, Universidad Nacional Autónoma de México, Circuito Exterior, Cd. Universitaria, Coyoacán, Ciudad de México, 04510. <sup>4</sup>Instituto Potosino de Investigación Científica y Tecnológica, Camino a la Presa San José 2055, Col. Lomas 4a. Sección, San Luis Potosí, México, 78216.

\***Correspondence:** Adela Rodríguez-Romero, Instituto de Química, Universidad Nacional Autónoma de México, Circuito Exterior, Cd. Universitaria, Coyoacán, Ciudad de México, 04510. Telephone: 5255-56224568, Fax: 5255-52162217, E-mail: [adela@unam.mx](mailto:adela@unam.mx)

**Table S1.** Primers design.

| <b>rHev b 8 + Enterokinase site</b>                                                                          | <b>rZea m 12 + TEV site</b>                                                                                                         |
|--------------------------------------------------------------------------------------------------------------|-------------------------------------------------------------------------------------------------------------------------------------|
| Forward: 5`-<br>CGCGGATCCGACGACGACGACAAGATG<br>ACGTGGCAGGCGTACGTAGATGATCAT-<br>3`<br><br>Site: <i>BamH I</i> | *Forward: 5'-<br>TACAGATCTGAAAACCTTGTATTTCCAGG<br>GCATGTCGTGGCAGGCGTACGTCGATG<br>ACCACCTGCTGTGCGACATC-3'<br><br>Site: <i>BglIII</i> |
| Reverse: 5`-<br>GGTAAGCTTTTAATAGCCCTGATCAATG<br>AGGTA-3`<br><br>Site: <i>Hind III</i>                        | Reverse: 5'-<br>GGTAAGCTTTTAGAAGCCCTGTTCGATC<br>AGGTA-3`<br><br>Site: <i>Hind III</i>                                               |

\*The TEV Site in rZea m 12 leaves a glycine residue in the N-terminus
